# Supplementary material for: Swelling‐Dependent Shape‐Based Transformation of a Human Mesenchymal Stromal Cells‐Laden 4D Bioprinted Construct for Cartilage Tissue Engineering
Source: PubMed Central journal article supplement (PMC11468569; doi:10.1002/adhm.202201891), 2022-11-17
Supplement: ADHM-12-2201891-s001.pdf [file ADHM-12-2201891-s001.pdf]

# ADVANCED HEALTHCARE MATERIALS

## Supporting Information

for *Adv. Healthcare Mater.*, DOI 10.1002/adhm.202201891

Swelling-Dependent Shape-Based Transformation of a Human Mesenchymal Stromal Cells-Laden 4D Bioprinted Construct for Cartilage Tissue Engineering

*Pedro J. Díaz-Payno\**, *Maria Kalogeropoulou*, *Iain Muntz*, *Esther Kingma*, *Nicole Kops*, *Matteo D'Este*, *Gijsje H. Koenderink*, *Lidy E. Fratila-Apachitei*, *Gerjo J. V. M. van Osch\** and *Amir A. Zadpoor\**

## Supporting Information

Swelling-dependent shape-based transformation of a hMSC-laden 4D bioprinted construct for cartilage tissue engineering

## Thixotropy test: Strain Vs Time

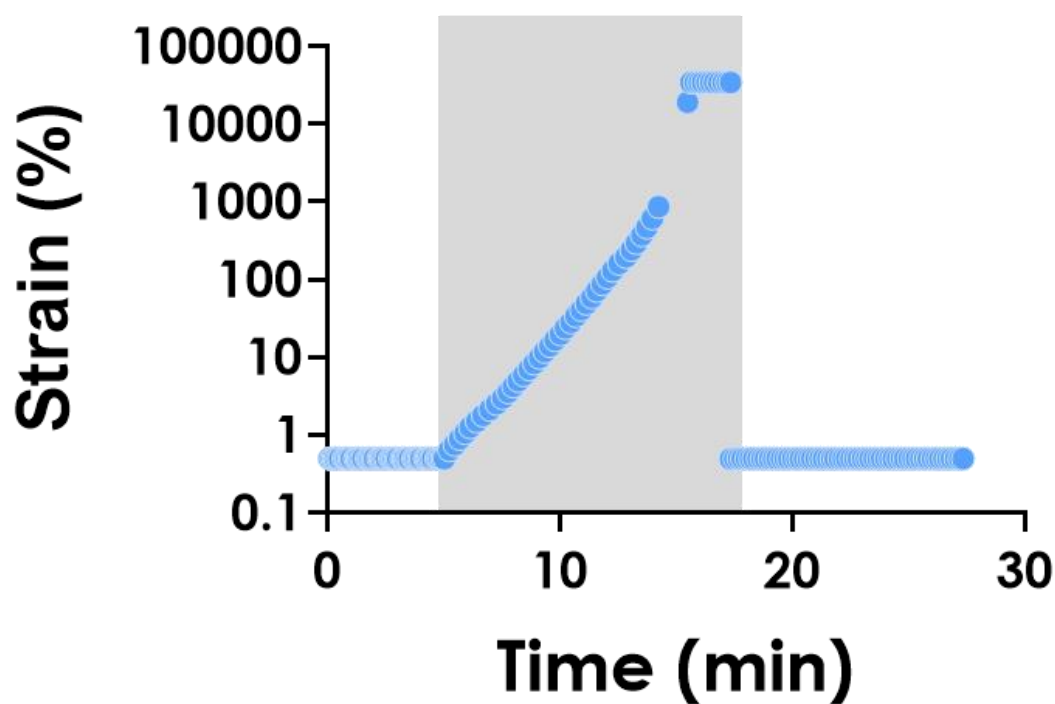

**Figure S1. Thixotropy test control.** Representative graft showing the Strain Vs time values for the thixotropy test from Figure 2g,h. The first and third step (non-shadowed) was kept at a constant 0.5 % strain, while in the second step (shadowed area) the stress was increased from 1 Pa to 5 kPa logarithmically in 51 steps.

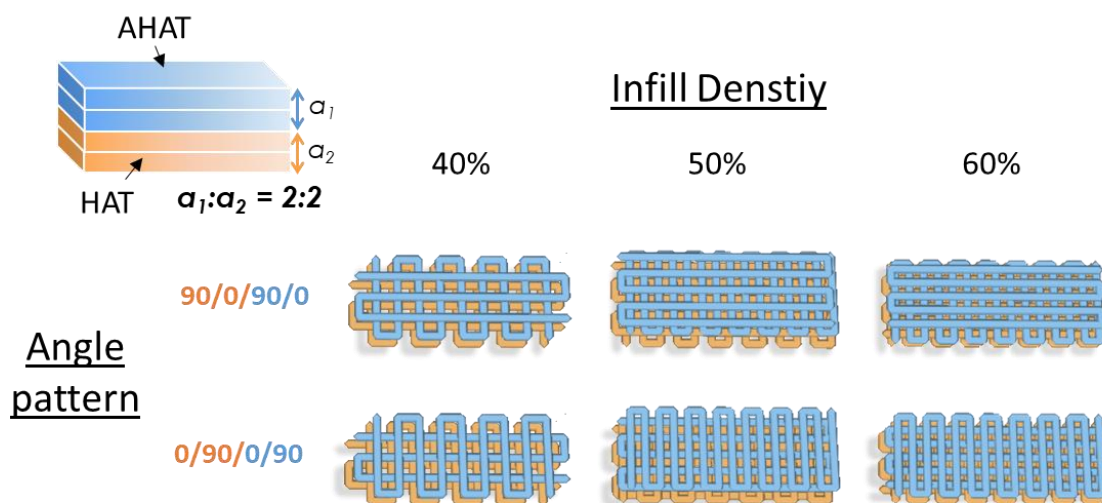

**Figure S2. Schematic of 3D printing designs.** Design of the AHAT: HAT layers 2:2 with different infill densities: 40, 50, and 60%; and the different angle pattern of each layer:  $90/0/90/0^\circ$  and  $0/90/0/90^\circ$ .

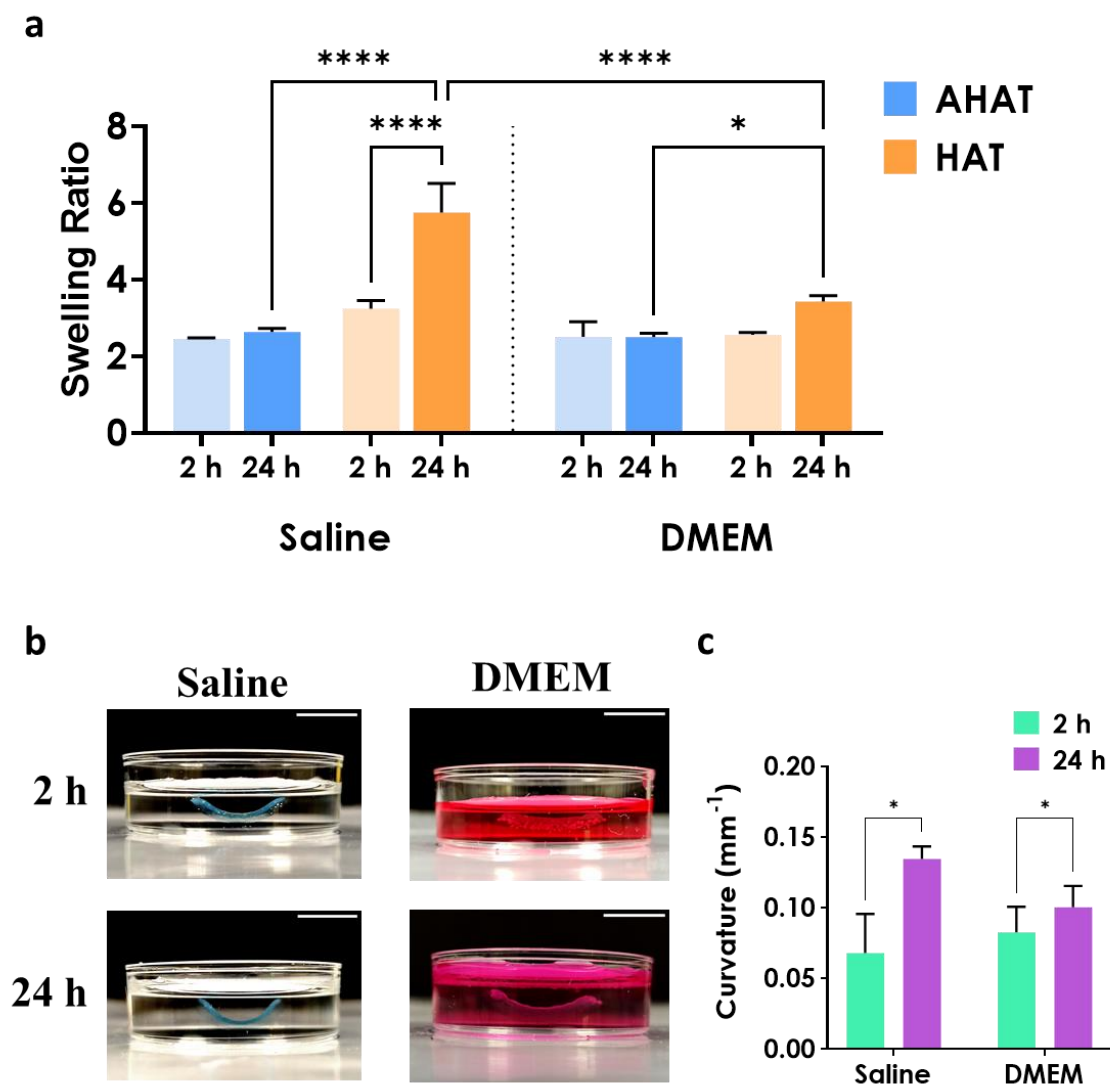

**Figure S3. Swelling and shape-change depends on swelling solution.** a) The swelling ratios of the AHAT (blue) and HAT (orange) printed scaffolds after 2 and 24 h of immersion in either saline (left) or DMEM (right). b) Representative images of the bilayer scaffolds made of AHAT:HAT 2:1 after 2 and 24 h of swelling in either saline (left) or DMEM (right). c) The degree of curvature measured from b) shows an increasing degree of curvature in both swelling solutions.

| Printing stage | Rheological properties                                                                                          | Parameters                                                                                                                         |
|----------------|-----------------------------------------------------------------------------------------------------------------|------------------------------------------------------------------------------------------------------------------------------------|
| I. Before      | <ul style="list-style-type: none"> <li>• Gelation kinetics</li> <li>• Support for encapsulated cells</li> </ul> | <ul style="list-style-type: none"> <li>• <math>G'</math></li> <li>• <math>G''</math></li> <li>• <math>\tan\delta</math></li> </ul> |
| II. During     | <ul style="list-style-type: none"> <li>• Shear-thinning</li> </ul>                                              | <ul style="list-style-type: none"> <li>• <math>\eta(\dot{\gamma})</math></li> </ul>                                                |
| III. After     | <ul style="list-style-type: none"> <li>• Shape-retention</li> <li>• Recovery kinetics</li> </ul>                | <ul style="list-style-type: none"> <li>• Yield stress</li> <li>• <math>G', G''/\text{time}</math></li> </ul>                       |

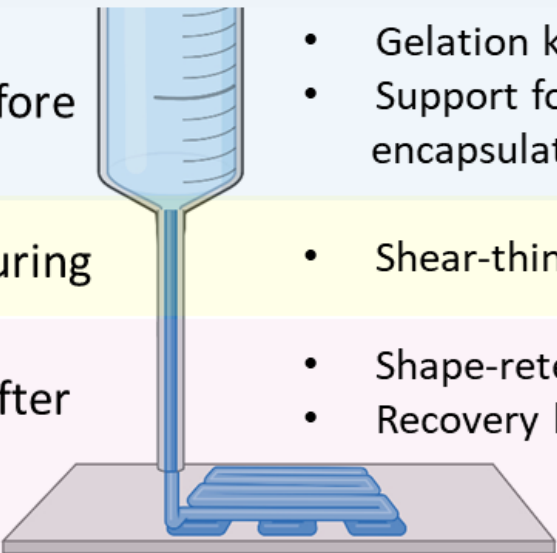

**Figure S4. 3D printing and rheology.** The different stages of the 3D/4D printing process: before printing, during printing, and after printing; and the relevant rheological properties and main parameters of each stage.

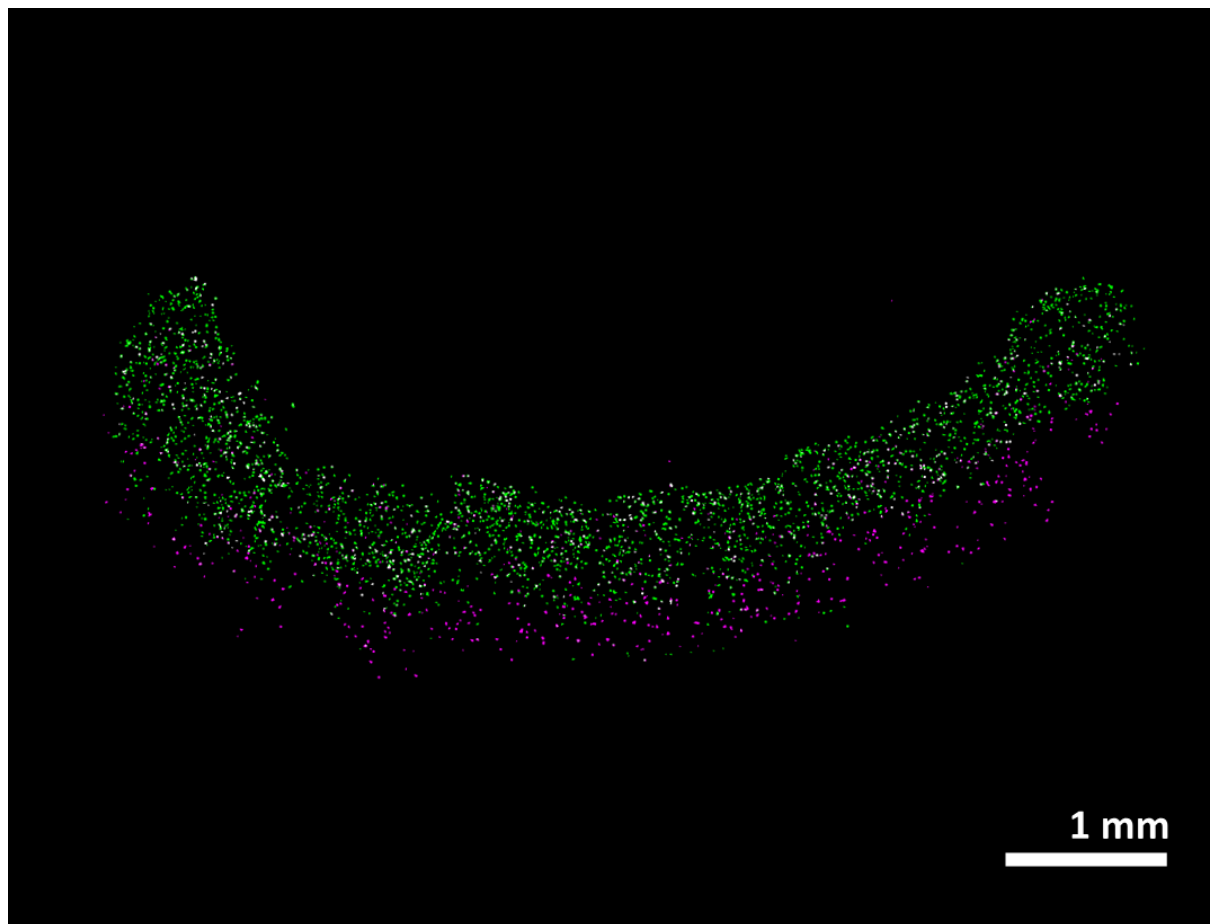

**Figure S5. Multilayered 4D bioprinted scaffold.** Confocal image displayed in Figure 8h showing the cells from the top layer labelled in green and the bottom layer, in purple.

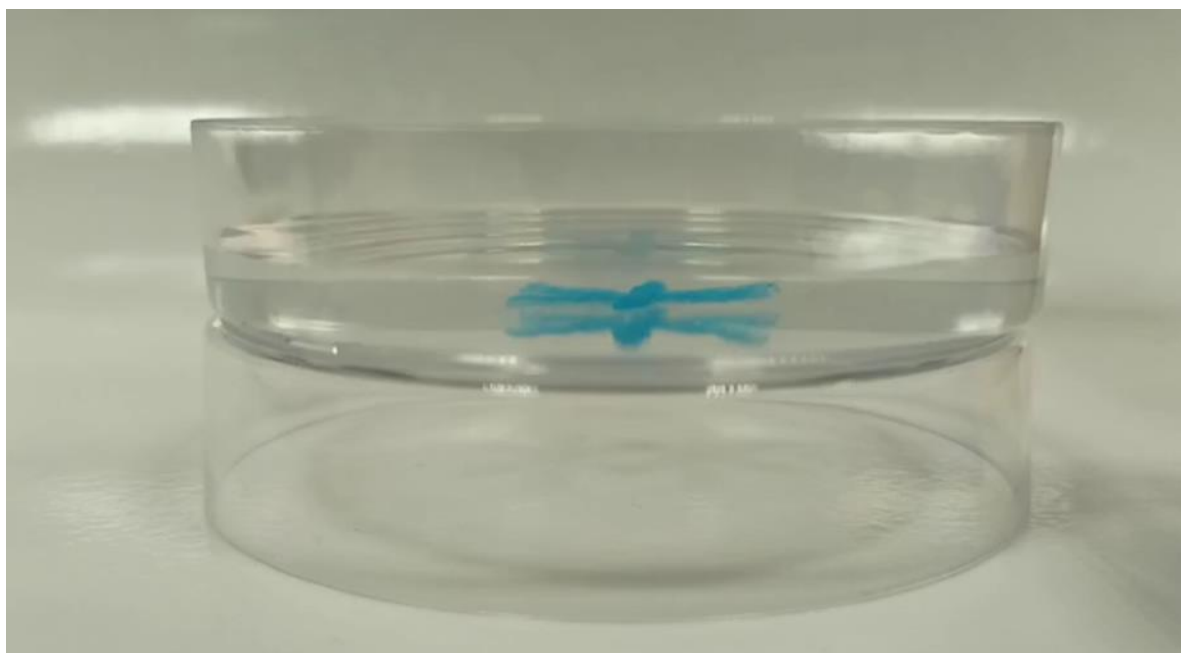

**Video S1.** Flower-shaped scaffold self-bending upon triggering with swelling solution. Go to video.
